# Supplementary material for: Impact of Neonatal Body (Dis)Proportionality Determined by the Cephalization Index (CI) on Gross Motor Development in Children with Down Syndrome: A Prospective Cohort Study
Source: MDPI journal article supplement (doi:10.3390/children10010013), 2022-12-21
Supplement: s1 [file s1]

Table S4. Discriminant analysis of the division of children with Down syndrome (DS) into two groups based on the proportionality of their anthropological measures as disproportionate cephalization index ( $CI \geq 1.1$ ) or proportionate ( $CI < 1.1$ ).

| DA Clasification Results <sup>1</sup> |                            |               |       |  |
|---------------------------------------|----------------------------|---------------|-------|--|
| Category                              | Predicted Group Membership |               | Total |  |
|                                       | $CI < 1.1$                 | $CI \geq 1.1$ |       |  |
| Original Count                        |                            |               |       |  |
| $CI < 1.1$                            | 26                         | 4             | 30    |  |
| $CI \geq 1.1$                         | 5                          | 21            | 26    |  |
| %                                     |                            |               |       |  |
| $CI < 1.1$                            | 86.7                       | 13.3          | 100.0 |  |
| $CI < 1.1$                            | 19.2                       | 80.8          | 100.0 |  |

<sup>1</sup>83.9% of original grouped cases were correctly classified.

83.9% children had correct classifications, of which 86.7% was correctly classified as proportionate CI, and 5 (13.3%) were wrongly classified as disproportionate CI, 80.8% was correctly classified and 4 (19.2%) were wrongly classified.

-
