# Supplementary material for: Impact of Neonatal Body (Dis)Proportionality Determined by the Cephalization Index (CI) on Gross Motor Development in Children with Down Syndrome: A Prospective Cohort Study
Source: MDPI journal article supplement (doi:10.3390/children10010013), 2022-12-21
Supplement: s1 [file s1]

Table S1. Reliability and content validity of the modified Munich Functional Developmental Diagnostics (MFDD).

| <b>Gross Motor Skills Milestones</b>                         | <b>Scale Mean If Item Deleted</b> | <b>Scale Variance If Item Deleted</b> | <b>Corrected Item-Total Correlation</b> | <b>Squared Multiple Correlation</b> | <b>Cronbach's Alpha If Item Deleted</b> |
|--------------------------------------------------------------|-----------------------------------|---------------------------------------|-----------------------------------------|-------------------------------------|-----------------------------------------|
| Lifts head up 90° with a forearm rest                        | 104.18                            | 630.668                               | 0.492                                   | 0.823                               | 0.931                                   |
| Extended arm support                                         | 104.18                            | 624.768                               | 0.573                                   | 0.679                               | 0.93                                    |
| Four point kneeling                                          | 104.16                            | 643.156                               | 0.326                                   | 0.586                               | 0.933                                   |
| Rolls both ways                                              | 104.18                            | 628.222                               | 0.525                                   | 0.747                               | 0.931                                   |
| Reciprocal creeping                                          | 104.18                            | 618.077                               | 0.666                                   | 0.821                               | 0.929                                   |
| Semiflexion of the hips and knees                            | 104.21                            | 652.499                               | 0.207                                   | 0.596                               | 0.934                                   |
| Holds body weight on legs when supported in standing         | 104.12                            | 630.184                               | 0.486                                   | 0.739                               | 0.931                                   |
| Stands up without support                                    | 103.98                            | 608.163                               | 0.764                                   | 0.969                               | 0.927                                   |
| Pulls to stand on furniture                                  | 103.98                            | 606.418                               | 0.787                                   | 0.965                               | 0.927                                   |
| Walks sideways along furniture                               | 103.87                            | 607.639                               | 0.752                                   | 0.883                               | 0.928                                   |
| Stands without support                                       | 103.89                            | 608.897                               | 0.745                                   | 0.903                               | 0.928                                   |
| Walks independently (Walks alone)                            | 103.86                            | 608.306                               | 0.734                                   | 0.925                               | 0.928                                   |
| Stands up without support (Gets to standing without support) | 103.79                            | 613.299                               | 0.658                                   | 0.796                               | 0.929                                   |
| Crouches and picks something up without support              | 103.8                             | 610.561                               | 0.701                                   | 0.872                               | 0.928                                   |

|                                                                                |        |         |       |       |       |
|--------------------------------------------------------------------------------|--------|---------|-------|-------|-------|
| Walks up one step at a time with rail holding                                  | 103.52 | 626.036 | 0.492 | 0.855 | 0.931 |
| Kicks a stationary ball                                                        | 103.36 | 619.325 | 0.572 | 0.74  | 0.93  |
| Walks down one step at a time with rail holding                                | 103.43 | 624.686 | 0.501 | 0.784 | 0.931 |
| Stands on one foot without help for 2 seconds                                  | 102.62 | 643.802 | 0.318 | 0.702 | 0.933 |
| Jumps in place                                                                 | 102.62 | 643.548 | 0.321 | 0.746 | 0.933 |
| Follows a toy with eyes                                                        | 104.14 | 637.797 | 0.399 | 0.59  | 0.932 |
| In traction - the head follows the torso                                       | 104.14 | 640.197 | 0.367 | 0.601 | 0.933 |
| Positioned, keeps sitting for at least 5 seconds supporting themselves forward | 104.14 | 625.288 | 0.571 | 0.674 | 0.93  |
| Positioned keep sitting for at least 1 minute                                  | 104.16 | 623.956 | 0.59  | 0.783 | 0.93  |
| Sits down alone                                                                | 104.14 | 619.797 | 0.626 | 0.707 | 0.929 |
| Sits alone stably                                                              | 104.18 | 625.822 | 0.558 | 0.785 | 0.93  |
