# Supplementary material for: Impact of Neonatal Body (Dis)Proportionality Determined by the Cephalization Index (CI) on Gross Motor Development in Children with Down Syndrome: A Prospective Cohort Study
Source: MDPI journal article supplement (doi:10.3390/children10010013), 2022-12-21
Supplement: s1 [file s1]

Table S5. Casewise analysis of the division of children with Down syndrome (DS) into two groups based on the proportionality of anthropometric measures (cephalization index [CI] $\geq$ 1.1 or proportionate [CI]<1.1).

| Casewise Statistics |              |                 |              |      |              |                                          |                      |              |                                          |                     |        |
|---------------------|--------------|-----------------|--------------|------|--------------|------------------------------------------|----------------------|--------------|------------------------------------------|---------------------|--------|
| Case Number         | Actual Group | Highest Group   |              |      |              |                                          | Second Highest Group |              |                                          | Discriminant Scores |        |
|                     |              | Predicted Group | P(D>d   G=g) |      | P(G=g   D=d) | Squared Mahalanobis Distance to Centroid | Group                | P(G=g   D=d) | Squared Mahalanobis Distance to Centroid | Function 1          |        |
|                     |              |                 | p            | df   |              |                                          |                      |              |                                          |                     |        |
| Original            | 1            | 0**             | ,436         | 1    | ,972         | ,607                                     | 1                    | ,028         | 7,207                                    | -1,716              |        |
|                     | 2            | 0               | ,779         | 1    | ,850         | ,079                                     | 1                    | ,150         | 3,033                                    | -,716               |        |
|                     | 3            | 1               | 0**          | ,840 | 1            | ,868                                     | ,041                 | 1            | ,132                                     | 3,281               | -,790  |
|                     | 4            | 1               | 1            | ,228 | 1            | ,996                                     | 1,453                | 0            | ,004                                     | 12,895              | 2,410  |
|                     | 5            | 1               | 1            | ,853 | 1            | ,938                                     | ,034                 | 0            | ,062                                     | 5,980               | 1,329  |
|                     | 6            | 1               | 1            | ,549 | 1            | ,978                                     | ,359                 | 0            | ,022                                     | 8,468               | 1,767  |
|                     | 7            | 0               | 0            | ,839 | 1            | ,867                                     | ,041                 | 1            | ,133                                     | 3,279               | -,789  |
|                     | 8            | 1               | 1            | ,757 | 1            | ,814                                     | ,096                 | 0            | ,186                                     | 3,567               | ,803   |
|                     | 9            | 0               | 0            | ,687 | 1            | ,950                                     | ,162                 | 1            | ,050                                     | 5,522               | -1,361 |
|                     | 10           | 1               | 1            | ,648 | 1            | ,968                                     | ,209                 | 0            | ,032                                     | 7,563               | 1,616  |
|                     | 11           | 1               | 0**          | ,290 | 1            | ,563                                     | 1,117                | 1            | ,437                                     | 1,103               | ,017   |
|                     | 12           | 1               | 1            | ,437 | 1            | ,986                                     | ,605                 | 0            | ,014                                     | 9,679               | 1,957  |
|                     | 13           | 0               | 0            | ,880 | 1            | ,878                                     | ,023                 | 1            | ,122                                     | 3,448               | -,838  |
|                     | 14           | 0               | 0            | ,549 | 1            | ,758                                     | ,359                 | 1            | ,242                                     | 2,127               | -,415  |
|                     | 15           | 1               | 1            | ,610 | 1            | ,972                                     | ,260                 | 0            | ,028                                     | 7,897               | 1,673  |
|                     | 16           | 0               | 0            | ,831 | 1            | ,865                                     | ,046                 | 1            | ,135                                     | 3,243               | -,779  |
|                     | 17           | 0               | 0            | ,305 | 1            | ,981                                     | 1,054                | 1            | ,019                                     | 8,441               | -1,950 |
|                     | 18           | 0               | 0            | ,330 | 1            | ,980                                     | ,951                 | 1            | ,020                                     | 8,176               | -1,902 |
|                     | 19           | 0               | 0            | ,349 | 1            | ,978                                     | ,877                 | 1            | ,022                                     | 7,980               | -1,865 |
|                     | 20           | 0               | 1**          | ,803 | 1            | ,835                                     | ,062                 | 0            | ,165                                     | 3,827               | ,867   |
|                     | 21           | 0               | 0            | ,755 | 1            | ,843                                     | ,098                 | 1            | ,157                                     | 2,934               | -,686  |
|                     | 22           | 0               | 0            | ,569 | 1            | ,768                                     | ,325                 | 1            | ,232                                     | 2,203               | -,443  |
|                     | 23           | 1               | 1            | ,480 | 1            | ,983                                     | ,498                 | 0            | ,017                                     | 9,181               | 1,881  |
|                     | 24           | 1               | 1            | ,847 | 1            | ,853                                     | ,037                 | 0            | ,147                                     | 4,081               | ,927   |
|                     | 25           | 0               | 0            | ,679 | 1            | ,951                                     | ,172                 | 1            | ,049                                     | 5,571               | -1,372 |
|                     | 26           | 1               | 1            | ,581 | 1            | ,975                                     | ,305                 | 0            | ,025                                     | 8,167               | 1,718  |
|                     | 27           | 0               | 0            | ,500 | 1            | ,967                                     | ,454                 | 1            | ,033                                     | 6,715               | -1,617 |
|                     | 28           | 0               | 1**          | ,546 | 1            | ,685                                     | ,364                 | 0            | ,315                                     | 2,432               | ,492   |
|                     | 29           | 0               | 0            | ,226 | 1            | ,986                                     | 1,467                | 1            | ,014                                     | 9,422               | -2,125 |
|                     | 30           | 1               | 1            | ,790 | 1            | ,949                                     | ,071                 | 0            | ,051                                     | 6,432               | 1,414  |
|                     | 31           | 0               | 0            | ,888 | 1            | ,923                                     | ,020                 | 1            | ,077                                     | 4,479               | -1,114 |
|                     | 32           | 0               | 0            | ,670 | 1            | ,952                                     | ,182                 | 1            | ,048                                     | 5,622               | -1,384 |
|                     | 33           | 0               | 0            | ,453 | 1            | ,971                                     | ,563                 | 1            | ,029                                     | 7,072               | -1,689 |
|                     | 34           | 0               | 1**          | ,378 | 1            | ,532                                     | ,778                 | 0            | ,468                                     | 1,553               | ,196   |
|                     | 35           | 1               | 1            | ,432 | 1            | ,587                                     | ,617                 | 0            | ,413                                     | 1,835               | ,299   |
|                     | 36           | 0               | 0            | ,376 | 1            | ,644                                     | ,783                 | 1            | ,356                                     | 1,449               | -,145  |
|                     | 37           | 1               | 1            | ,759 | 1            | ,954                                     | ,094                 | 0            | ,046                                     | 6,662               | 1,457  |
|                     | 38           | 1               | 0**          | ,545 | 1            | ,756                                     | ,367                 | 1            | ,244                                     | 2,108               | -,409  |
|                     | 39           | 0               | 0            | ,716 | 1            | ,946                                     | ,132                 | 1            | ,054                                     | 5,359               | -1,324 |
|                     | 40           | 1               | 1            | ,578 | 1            | ,975                                     | ,310                 | 0            | ,025                                     | 8,193               | 1,722  |
|                     | 41           | 1               | 1            | ,999 | 1            | ,904                                     | ,000                 | 0            | ,096                                     | 5,008               | 1,132  |
|                     | 42           | 0               | 0            | ,587 | 1            | ,777                                     | ,296                 | 1            | ,223                                     | 2,272               | -,467  |
|                     | 43           | 0               | 0            | ,862 | 1            | ,873                                     | ,030                 | 1            | ,127                                     | 3,374               | -,817  |
|                     | 44           | 1               | 1            | ,954 | 1            | ,916                                     | ,003                 | 0            | ,084                                     | 5,300               | 1,193  |
|                     | 45           | 1               | 1            | ,500 | 1            | ,982                                     | ,455                 | 0            | ,018                                     | 8,968               | 1,847  |
|                     | 46           | 0               | 0            | ,163 | 1            | ,989                                     | 1,948                | 1            | ,011                                     | 10,457              | -2,299 |
|                     | 47           | 0               | 0            | ,283 | 1            | ,555                                     | 1,151                | 1            | ,445                                     | 1,074               | ,032   |
|                     | 48           | 1               | 1            | ,573 | 1            | ,976                                     | ,318                 | 0            | ,024                                     | 8,239               | 1,730  |
|                     | 49           | 0               | 0            | ,105 | 1            | ,992                                     | 2,628                | 1            | ,008                                     | 11,796              | -2,512 |
|                     | 50           | 0               | 1**          | ,907 | 1            | ,927                                     | ,014                 | 0            | ,073                                     | 5,612               | 1,256  |
|                     | 51           | 1               | 1            | ,301 | 1            | ,993                                     | 1,070                | 0            | ,007                                     | 11,551              | 2,229  |
|                     | 52           | 1               | 1            | ,478 | 1            | ,629                                     | ,502                 | 0            | ,371                                     | 2,076               | ,380   |
|                     | 53           | 1               | 1            | ,097 | 1            | ,999                                     | 2,753                | 0            | ,001                                     | 16,818              | 2,892  |
|                     | 54           | 0               | 0            | ,252 | 1            | ,984                                     | 1,314                | 1            | ,016                                     | 9,071               | -2,063 |
|                     | 55           | 1               | 0**          | ,327 | 1            | ,599                                     | ,963                 | 1            | ,401                                     | 1,250               | -,054  |
|                     | 56           | 0               | 0            | ,515 | 1            | ,966                                     | ,423                 | 1            | ,034                                     | 6,607               | -1,595 |

\*\* Misclassified case

\*Misclassified children. The discriminant analysis results (Supplementary Table 4) are based on casewise statistics. By analyzing the results in Supplementary Table 5, it was possible to determine which children with DS had a proportionate CI denoted as group 0 (without clinical characteristics) and a disproportionate CI denoted as group 1 (with clinical characteristics of disproportionality).
