# Supplementary material for: Impact of Neonatal Body (Dis)Proportionality Determined by the Cephalization Index (CI) on Gross Motor Development in Children with Down Syndrome: A Prospective Cohort Study
Source: MDPI journal article supplement (doi:10.3390/children10010013), 2022-12-21
Supplement: s1 [file s1]

File S1. STROBE Statement—Checklist of items that should be included in reports of *cohort studies*

|                              | Item No. | Recommendation                                                                                                                                                                                    | Page No. |
|------------------------------|----------|---------------------------------------------------------------------------------------------------------------------------------------------------------------------------------------------------|----------|
| <b>Title and abstract</b>    | 1        | (a) Indicate the study's design with a commonly used term in the title or the abstract                                                                                                            | 1        |
|                              |          | (b) Provide in the abstract an informative and balanced summary of what was done and what was found                                                                                               | 1        |
| <b>Introduction</b>          |          |                                                                                                                                                                                                   |          |
| Background/rationale         | 2        | Explain the scientific background and rationale for the investigation being reported                                                                                                              | 2-3      |
| Objectives                   | 3        | State specific objectives, including any prespecified hypotheses                                                                                                                                  | 3        |
| <b>Methods</b>               |          |                                                                                                                                                                                                   |          |
| Study design                 | 4        | Present key elements of study design early in the paper                                                                                                                                           | 3-5      |
| Setting                      | 5        | Describe the setting, locations, and relevant dates, including periods of recruitment, exposure, follow-up, and data collection                                                                   | 3-5      |
| Participants                 | 6        | (a) Give the eligibility criteria, and the sources and methods of selection of participants. Describe methods of follow-up                                                                        | 3-5      |
|                              |          | (b) For matched studies, give matching criteria and number of exposed and unexposed                                                                                                               | ---      |
| Variables                    | 7        | Clearly define all outcomes, exposures, predictors, potential confounders, and effect modifiers. Give diagnostic criteria, if applicable                                                          | 3-5      |
| Data sources/<br>measurement | 8*       | For each variable of interest, give sources of data and details of methods of assessment (measurement). Describe comparability of assessment methods if there is more than one group              | 3-5      |
| Bias                         | 9        | Describe any efforts to address potential sources of bias                                                                                                                                         | 3-5      |
| Study size                   | 10       | Explain how the study size was arrived at                                                                                                                                                         | 3        |
| Quantitative variables       | 11       | Explain how quantitative variables were handled in the analyses. If applicable, describe which groupings were chosen and why                                                                      | 5        |
| Statistical methods          | 12       | (a) Describe all statistical methods, including those used to control for confounding                                                                                                             | 5        |
|                              |          | (b) Describe any methods used to examine subgroups and interactions                                                                                                                               | --       |
|                              |          | (c) Explain how missing data were addressed                                                                                                                                                       | --       |
|                              |          | (d) If applicable, explain how loss to follow-up was addressed                                                                                                                                    | --       |
|                              |          | (e) Describe any sensitivity analyses                                                                                                                                                             | --       |
| <b>Results</b>               |          |                                                                                                                                                                                                   |          |
| Participants                 | 13*      | (a) Report numbers of individuals at each stage of study—eg numbers potentially eligible, examined for eligibility, confirmed eligible, included in the study, completing follow-up, and analysed | 5-6      |
|                              |          | (b) Give reasons for non-participation at each stage                                                                                                                                              | --       |
|                              |          | (c) Consider use of a flow diagram                                                                                                                                                                | --       |
| Descriptive data             | 14*      | (a) Give characteristics of study participants (eg demographic, clinical, social) and information on exposures and potential confounders                                                          | 5-15     |
|                              |          | (b) Indicate number of participants with missing data for each variable of interest                                                                                                               | 5        |
|                              |          | (c) Summarise follow-up time (eg, average and total amount)                                                                                                                                       | 5        |
| Outcome data                 | 15*      | Report numbers of outcome events or summary measures over time                                                                                                                                    | 5-15     |

|                          |    |                                                                                                                                                                                                              |       |
|--------------------------|----|--------------------------------------------------------------------------------------------------------------------------------------------------------------------------------------------------------------|-------|
| Main results             | 16 | (a) Give unadjusted estimates and, if applicable, confounder-adjusted estimates and their precision (eg, 95% confidence interval). Make clear which confounders were adjusted for and why they were included | 5-15  |
|                          |    | (b) Report category boundaries when continuous variables were categorized                                                                                                                                    | --    |
|                          |    | (c) If relevant, consider translating estimates of relative risk into absolute risk for a meaningful time period                                                                                             |       |
| Other analyses           | 17 | Report other analyses done—eg analyses of subgroups and interactions, and sensitivity analyses                                                                                                               | 5-15  |
| <b>Discussion</b>        |    |                                                                                                                                                                                                              |       |
| Key results              | 18 | Summarise key results with reference to study objectives                                                                                                                                                     | 15    |
| Limitations              | 19 | Discuss limitations of the study, taking into account sources of potential bias or imprecision. Discuss both direction and magnitude of any potential bias                                                   | 17    |
| Interpretation           | 20 | Give a cautious overall interpretation of results considering objectives, limitations, multiplicity of analyses, results from similar studies, and other relevant evidence                                   | 15-17 |
| Generalisability         | 21 | Discuss the generalisability (external validity) of the study results                                                                                                                                        | 17    |
| <b>Other information</b> |    |                                                                                                                                                                                                              |       |
| Funding                  | 22 | Give the source of funding and the role of the funders for the present study and, if applicable, for the original study on which the present article is based                                                | --    |
