# Supplementary material for: Impact of Neonatal Body (Dis)Proportionality Determined by the Cephalization Index (CI) on Gross Motor Development in Children with Down Syndrome: A Prospective Cohort Study
Source: MDPI journal article supplement (doi:10.3390/children10010013), 2022-12-21
Supplement: s1 [file s1]

Table S3. Equality of group means in children with Down syndrome (DS) with a proportionate cephalization index (CI) and disproportionate CI.

| Milestones                                                   | Wilks' Lambda | F     | df1 | df2 | P-value |
|--------------------------------------------------------------|---------------|-------|-----|-----|---------|
| Lifts head up 90° with a forearm rest                        | 0.922         | 4.575 | 1   | 54  | 0.037*  |
| Extended arm support                                         | 0.908         | 5.481 | 1   | 54  | 0.023*  |
| Four point kneeling                                          | 0.997         | 0.147 | 1   | 54  | 0.703   |
| Rolls both ways                                              | 0.999         | 0.081 | 1   | 54  | 0.777   |
| Reciprocal creeping                                          | 1.000         | 0.012 | 1   | 54  | 0.915   |
| Semiflexion of the hips and knees                            | 0.981         | 1.044 | 1   | 54  | 0.311   |
| Holds body weight on legs when supported in standing         | 0.990         | 0.538 | 1   | 54  | 0.467   |
| Stands up without support                                    | 0.999         | 0.064 | 1   | 54  | 0.801   |
| Pulls to stand on furniture                                  | 1.000         | 0.007 | 1   | 54  | 0.933   |
| Walks sideways along furniture                               | 0.996         | 0.201 | 1   | 54  | 0.656   |
| Stands without support                                       | 0.998         | 0.092 | 1   | 54  | 0.762   |
| Walks independently (Walks alone)                            | 0.995         | 0.282 | 1   | 54  | 0.598   |
| Stands up without support (Gets to standing without support) | 1.000         | 0.004 | 1   | 54  | 0.95    |
| Crouches and picks something up without support              | 0.993         | 0.393 | 1   | 54  | 0.533   |
| Walks up one step at a time with rail holding                | 0.997         | 0.149 | 1   | 54  | 0.701   |
| Kicks a stationary ball                                      | 0.968         | 1.756 | 1   | 54  | 0.191   |
| Walks down one step at a time with rail holding              | 1.000         | 0.020 | 1   | 54  | 0.889   |

|                                                                                |       |       |   |    |        |
|--------------------------------------------------------------------------------|-------|-------|---|----|--------|
| Stands on one foot without help for 2 seconds                                  | 0.989 | 0.573 | 1 | 54 | 0.452  |
| Jumps in place                                                                 | 0.989 | 0.573 | 1 | 54 | 0.452  |
| Follows a toy with eyes                                                        | 0.945 | 3.163 | 1 | 54 | 0.081  |
| In traction - the head follows the torso                                       | 0.965 | 1.948 | 1 | 54 | 0.168  |
| Positioned, keeps sitting for at least 5 seconds supporting themselves forward | 0.933 | 3.900 | 1 | 54 | 0.053* |
| Positioned keep sitting for at least 1 minute                                  | 0.939 | 3.489 | 1 | 54 | 0.067  |
| Sits down alone                                                                | 1.000 | 0.030 | 1 | 54 | 0.956  |
| Sits alone stably                                                              | 1.000 | 0.050 | 1 | 54 | 0.945  |

\*p<0.05
