# Supplementary material for: Impact of Neonatal Body (Dis)Proportionality Determined by the Cephalization Index (CI) on Gross Motor Development in Children with Down Syndrome: A Prospective Cohort Study
Source: MDPI journal article supplement (doi:10.3390/children10010013), 2022-12-21
Supplement: s1 [file s1]

Table S2. Levene's test of homogeneity of Munich Functional Developmental Diagnostics (MFDD) motor scales in children with Down syndrome (DS) who had proportionate cephalization index (CI) and disproportionate CI.

| Gross Motor Skills Milestones                                                                                          | Levene Statistic | df1 | df2 | Sig.  |
|------------------------------------------------------------------------------------------------------------------------|------------------|-----|-----|-------|
| Lifts head up 90°, with a forearm rest                                                                                 | 0.064            | 1   | 54  | 0.802 |
| Pulls his chest away with his arms outstretched (Extended arm support)                                                 | 0.606            | 1   | 54  | 0.440 |
| Rises to his knees and palms (Four point kneeling)                                                                     | 1.908            | 1   | 54  | 0.173 |
| Rolls from the back to the abdomen and vice versa (Rolls both ways)                                                    | 3.451            | 1   | 54  | 0.069 |
| Crawls on hands and knees (Reciprocal creeping )                                                                       | 6.514            | 1   | 54  | 0.014 |
| Semiflexion of the hips and knees                                                                                      | 0.304            | 1   | 54  | 0.584 |
| Takes body weight on legs when supported in standing                                                                   | 2.841            | 1   | 54  | 0.098 |
| Stands with support                                                                                                    | 0.043            | 1   | 54  | 0.837 |
| Pulls to stand on furniture                                                                                            | 0.166            | 1   | 54  | 0.685 |
| Walks sideways along furniture                                                                                         | 1.948            | 1   | 54  | 0.169 |
| Stands without support                                                                                                 | 1.603            | 1   | 54  | 0.211 |
| Walks independently (Walks alone)                                                                                      | 0.082            | 1   | 54  | 0.775 |
| Stands up without support (Gets to standing without support)                                                           | 0.899            | 1   | 54  | 0.347 |
| Crouches (Bends) and picks something up without supporting himself                                                     | 1.719            | 1   | 54  | 0.195 |
| Walks up one step at a time with rail holding                                                                          | 0.039            | 1   | 54  | 0.845 |
| Kicks a stationary ball                                                                                                | 0.004            | 1   | 54  | 0.947 |
| Walks down one step at a time with rail holding                                                                        | 0.097            | 1   | 54  | 0.756 |
| Stands on one foot without help 2 s                                                                                    | 1.170            | 1   | 54  | 0.284 |
| Jumps in place                                                                                                         | 1.144            | 1   | 54  | 0.290 |
| Follows the toy from one corner of the eye to another (Follows the toy with his eyes)                                  | 3.064            | 1   | 54  | 0.086 |
| In traction, the head follows the torso                                                                                | 0.992            | 1   | 54  | 0.324 |
| Positioned keep sitting for at least 5 s, supporting itself forward (Sits for at least 5 s, supporting itself forward) | 1.403            | 1   | 54  | 0.241 |
| Positioned keep sitting for at least 1 minute                                                                          | 0.552            | 1   | 54  | 0.461 |
| Sits down alone                                                                                                        | 0.650            | 1   | 54  | 0.423 |
| Sits alone stable                                                                                                      | 1.376            | 1   | 54  | 0.246 |
