# Supplementary material for: Impact of Neonatal Body (Dis)Proportionality Determined by the Cephalization Index (CI) on Gross Motor Development in Children with Down Syndrome: A Prospective Cohort Study
Source: Children (Basel). 2022 Dec 21;10(1):13. doi: 10.3390/children10010013 (PMC9856915; doi:10.3390/children10010013)
Supplement: Supplementary file 1 [file children-10-00013-s001.zip]

Archive with 6 entries (6 files):
- ARC_STROBE-checklist-v4-cohort.pdf
- Supplementary Table S1_01.12.22.pdf
- Supplementary Table S2_01.12.22.pdf
- Supplementary Table S3_01.12.22.pdf
- Supplementary Table S4_01.12.22.pdf
- Supplementary Table S5_01.12.22.pdf
